# Supplementary material
Source: publisher figshare collection journal article supplement (https://frontiersin.figshare.com/ndownloader/files/23766389)
Supplement: Supplementary file 1 [file 23766389]

## Sheet: Tabelle1
Mean sample depth below surface (cm)	DNA Fraction (ng DNA/g sediment)	Mean Merged Read Length (bp)	water content (%)	organic matter content (%)	inorganic matter content (%)	density (g/cm3)	magnetic susceptibility	pH sediment	Temperature soil (°C)	Mg	Al	Si	P	S	Cl	Ar	K	Ca	Sc	Ti	V	Mn	Fe	Co	Ni	Cu	Zn	Ga	Ge	As	Se	Br	Rb	Sr	Y	Zr	Sn	Sb	I	Cs	Ba	La	Pr	Eu	Tb	Ho	Tm	Hf	Ta
1.16084	52.9183	151	60.322	19.8298	80.1702	0.975525	1.5	4.42	17	14	564	2541	150	441	552	12333	52236	8083	456	62683	2719	1624	175911	1235	570	403	415	658	165	419	167	0	2539	1308	226	3918	509	163	57	568	5013	657	3236	3833	2772	470	821	158	0
6.96503	46.6403	143	54.9802	18.1685	81.8315	1.1898	1.8	5.81	16.55	0	890	4356	210	733	874	10278	74522	9032	502	90480	2428	1673	265903	1763	220	263	832	418	421	304	209	0	2115	885	438	3643	575	114	121	509	5429	679	3471	4582	3320	599	676	163	237
12.7692	34.2578	140	61.7955	22.2127	77.7873	1.2837	5.9	6.09	16.7	16	420	2163	185	622	173	11809	70457	7359	498	85477	2475	994	267629	1962	345	276	687	384	291	483	342	0	2523	1339	683	4034	683	250	56	557	5878	697	3685	3663	3407	616	819	232	88
24.3776	9.55645	147	61.9427	23.619	76.381	1.16568	2.6	6.16	17.5	53	808	4848	233	958	173	12877	91674	8934	577	99411	2580	423	285232	1974	210	272	696	339	314	383	0	0	3078	1491	28	4094	769	147	81	408	6071	781	3124	3474	3748	445	599	125	143
70.8112	6.95312	150	52.1159	16.9187	83.0813	1.36605	14.5	6.23	17.2	15	739	3950	210	706	233	11972	93810	7668	689	129409	2963	0	453016	3044	0	469	1060	120	268	237	375	0	2901	1275	286	3983	758	340	46	629	7031	755	3867	3674	5749	842	611	259	240
[truncated: 6 more columns]
